# Supplementary material for: Mutations in BRCA1, BRCA2, and PALB2, and a panel of 50 cancer-associated genes in pancreatic ductal adenocarcinoma
Source: PubMed Central journal article supplement (PMC5970161; doi:10.1038/s41598-018-26526-x), 2018-05-25
Supplement: 41598_2018_26526_MOESM1_ESM.pdf [file 41598_2018_26526_MOESM1_ESM.pdf]

**Supplementary Information for**

**“Mutations in *BRCA1*, *BRCA2*, and *PALB2*, and a panel of 50 cancer-associated genes in  
pancreatic ductal adenocarcinoma”**

by

Shoko Takeuchi, Manami Doi, Naoki Ikari , Masakazu Yamamoto, and Toru Furukawa

**Supplementary Table S1.** Clinicopathological features of examined 42 patients

| Feature                               |                                      | n (%)*                |
|---------------------------------------|--------------------------------------|-----------------------|
| Age at operation                      | Mean, range                          | 66 years, 43-87 years |
| Sex                                   | Male                                 | 21 (50.0)             |
|                                       | Female                               | 21 (50.0)             |
| Histology                             | tubular adenocarcinoma               | 34 (81.0)             |
|                                       | poorly differentiated adenocarcinoma | 5 (11.9)              |
|                                       | mucinous carcinoma                   | 2 (4.8)               |
|                                       | adenosquamous carcinoma              | 1 (2.4)               |
| pStage                                | 0                                    | 0 (0.0)               |
|                                       | I                                    | 1 (2.4)               |
|                                       | II                                   | 6 (14.3)              |
|                                       | III                                  | 18 (42.9)             |
|                                       | IVa                                  | 16 (38.1)             |
|                                       | IVb                                  | 1 (2.4)               |
| Recurrence                            | Recurred                             | 27 (64.3)             |
|                                       | Not recurred                         | 15 (35.7)             |
| Previous cancer history               | >1 Primary cancer                    | 11 (26.2)             |
|                                       | Breast                               | 3 (7.1)               |
|                                       | Colorectal                           | 3(7.1)                |
|                                       | Ovarian                              | 1 (2.4)               |
|                                       | Other                                | 6 (14.3)              |
| Family history                        |                                      |                       |
| FDR and/or SDR with any cancers       | ≥3                                   | 2 (4.8)               |
|                                       | 2                                    | 6 (14.3)              |
|                                       | 1                                    | 12 (28.6)             |
|                                       | 0                                    | 22 (52.4)             |
| FDR and/or SDR with pancreatic cancer | ≥3                                   | 0 (0.0)               |
|                                       | 2                                    | 0 (0.0)               |
|                                       | 1                                    | 5 (11.9)              |
|                                       | 0                                    | 37 (88.1)             |
| Prognosis                             | 5-year overall survival              | 0.316                 |

\*Number of cases except for age.

FDR, first degree relatives; SDR, second degree relatives

**Supplementary Table S2.** 50 target genes in the Ion AmpliSeq Cancer Hotspot Panel v2 (Thermo Fisher Scientific)

---

|               |                |
|---------------|----------------|
| <i>ABL1</i>   | <i>IDH2</i>    |
| <i>AKT1</i>   | <i>JAK2</i>    |
| <i>ALK</i>    | <i>JAK3</i>    |
| <i>APC</i>    | <i>KDR</i>     |
| <i>ATM</i>    | <i>KIT</i>     |
| <i>BRAF</i>   | <i>KRAS</i>    |
| <i>CDH1</i>   | <i>MET</i>     |
| <i>CDKN2A</i> | <i>MLH1</i>    |
| <i>CSF1R</i>  | <i>MPL</i>     |
| <i>CTNNB1</i> | <i>NOTCH1</i>  |
| <i>EGFR</i>   | <i>NPM1</i>    |
| <i>ERBB2</i>  | <i>NRAS</i>    |
| <i>ERBB4</i>  | <i>PDGFRA</i>  |
| <i>EZH2</i>   | <i>PIK3CA</i>  |
| <i>FBXW7</i>  | <i>PTEN</i>    |
| <i>FGFR1</i>  | <i>PTPN11</i>  |
| <i>FGFR2</i>  | <i>RB1</i>     |
| <i>FGFR3</i>  | <i>RET</i>     |
| <i>FLT3</i>   | <i>SMAD4</i>   |
| <i>GNA11</i>  | <i>SMARCB1</i> |
| <i>GNAQ</i>   | <i>SMO</i>     |
| <i>GNAS</i>   | <i>SRC</i>     |
| <i>HNF1A</i>  | <i>STK11</i>   |
| <i>HRAS</i>   | <i>TP53</i>    |
| <i>IDH1</i>   | <i>VHL</i>     |

---

**Supplementary Table S3.** Processing of variants obtained by next-generation targeted sequencing

---

**Germline mutation**

---

nonsynonymous, GQ $\geq$ 100, AF $\geq$ 0.10, ExAC $\geq$ 0.01 or not reported, validation by Sanger sequencing

---

**Somatic mutation**

---

In tumor only, nonsynonymous, GQ $\geq$ 100, AF $\geq$ 0.04 in CHPv2: 0.10 in BRCA pathway genes, validation by Sanger sequencing

---

AF, allele frequency; GQ, genotype quality; ExAC, Exome Aggregation Consortium;

CHPv2, the Ion AmpliSeq Cancer Hotspot Panel v2 (Thermo Fisher Scientific)

**Supplementary Table S4.** Mutations identified in BRCA-pathway genes and hotspots of 50 cancer associated genes

| Case* | pStage | BRCA-pathway mutations |          |          | Hotspot mutations in 50 cancer associated genes |         |          |      |
|-------|--------|------------------------|----------|----------|-------------------------------------------------|---------|----------|------|
|       |        | Gene                   | Status   | Mutation | Gene                                            | Status  | Mutation | AF   |
| 1     | III    | -                      | -        | -        | <i>KRAS</i>                                     | somatic | G12D     | 0.33 |
|       |        | -                      | -        | -        | <i>TP53</i>                                     | somatic | R282W    | 0.39 |
|       |        | -                      | -        | -        | <i>GNAS</i>                                     | somatic | R201C    | 0.26 |
| 2     | III    | <i>BRCA2</i>           | germline | G2044V   | <i>KRAS</i>                                     | somatic | Q61R     | 0.34 |
|       |        | -                      | -        | -        | <i>GNAS</i>                                     | somatic | R201H    | 0.37 |
| 3     | III    | <i>PALB2</i>           | germline | Y743C    | <i>SMARCB1</i>                                  | somatic | T72K     | 0.10 |
| 4     | III    | -                      | -        | -        | <i>KRAS</i>                                     | somatic | G12R     | 0.19 |
| 5     | II     | -                      | -        | -        | <i>KRAS</i>                                     | somatic | G12V     | 0.07 |
| 6     | III    | <i>BRCA2</i>           | germline | T582P    | <i>KRAS</i>                                     | somatic | G12D     | 0.12 |
|       |        | -                      | -        | -        | <i>GNAS</i>                                     | somatic | R201H    | 0.12 |
| 7     | III    | <i>BRCA2</i>           | germline | L184P    | <i>KRAS</i>                                     | somatic | G12C     | 0.32 |
|       |        | -                      | -        | -        | <i>TP53</i>                                     | somatic | V173A    | 0.50 |
|       |        | -                      | -        | -        | <i>SMAD4</i>                                    | somatic | D351Y    | 0.35 |
| 8     | IVa    | -                      | -        | -        | <i>KRAS</i>                                     | somatic | G12D     | 0.08 |
|       |        | -                      | -        | -        | <i>SMAD4</i>                                    | somatic | L109R    | 0.06 |
| 9     | IVa    | -                      | -        | -        | <i>KRAS</i>                                     | somatic | G12R     | 0.09 |
|       |        | -                      | -        | -        | <i>TP53</i>                                     | somatic | R175H    | 0.09 |
| 10    | IVa    | -                      | -        | -        | <i>KRAS</i>                                     | somatic | G12V     | 0.08 |
| 11    | III    | <i>BRCA2</i>           | germline | K322Q    | <i>KRAS</i>                                     | somatic | G12R     | 0.09 |
|       |        | <i>BRCA2</i>           | germline | P3292L   | -                                               | -       | -        | -    |
| 12    | IVa    | -                      | -        | -        | <i>KRAS</i>                                     | somatic | G12D     | 0.21 |
|       |        | -                      | -        | -        | <i>TP53</i>                                     | somatic | Y220C    | 0.14 |
|       |        | -                      | -        | -        | <i>RBI</i>                                      | somatic | R320X    | 0.21 |
| 13    | IVa    | -                      | -        | -        | <i>KRAS</i>                                     | somatic | G12D     | 0.22 |
| 14    | III    | -                      | -        | -        | <i>KRAS</i>                                     | somatic | G12D     | 0.30 |
|       |        | -                      | -        | -        | <i>TP53</i>                                     | somatic | R273C    | 0.30 |
|       |        | -                      | -        | -        | <i>GNAS</i>                                     | somatic | R201C    | 0.23 |
| 15    | IVa    | -                      | -        | -        | <i>KRAS</i>                                     | somatic | G12V     | 0.11 |
|       |        | -                      | -        | -        | <i>TP53</i>                                     | somatic | R282W    | 0.14 |
| 16    | III    | -                      | -        | -        | <i>KRAS</i>                                     | somatic | G12C     | 0.26 |
| 17    | III    | -                      | -        | -        | <i>KRAS</i>                                     | somatic | G12V     | 0.18 |
|       |        | -                      | -        | -        | <i>TP53</i>                                     | somatic | A138V    | 0.26 |
| 18    | III    | -                      | -        | -        | <i>KRAS</i>                                     | somatic | G12D     | 0.04 |
| 19    | III    | <i>BRCA2</i>           | germline | M784V    | <i>KRAS</i>                                     | somatic | G12D     | 0.25 |
| 20    | III    | -                      | -        | -        | <i>KRAS</i>                                     | somatic | G12D     | 0.28 |
| 21    | IVa    | -                      | -        | -        | <i>KRAS</i>                                     | somatic | G12R     | 0.37 |
|       |        | -                      | -        | -        | <i>TP53</i>                                     | somatic | R306X    | 0.09 |
| 22    | IVa    | -                      | -        | -        | <i>KRAS</i>                                     | somatic | G12V     | 0.05 |
|       |        | -                      | -        | -        | <i>SMAD4</i>                                    | somatic | V409fs   | 0.08 |
| 23    | II     | -                      | -        | -        | <i>KRAS</i>                                     | somatic | G12V     | 0.44 |

|    |     |              |          |         |               |          |              |      |
|----|-----|--------------|----------|---------|---------------|----------|--------------|------|
| 24 | IVa | <i>BRCA2</i> | germline | S2148fs | -             | -        | -            | -    |
| 26 | IVa | -            | -        | -       | <i>KRAS</i>   | somatic  | G12V         | 0.21 |
|    |     | -            | -        | -       | <i>TP53</i>   | somatic  | P278A        | 0.20 |
| 27 | II  | -            | -        | -       | <i>KRAS</i>   | somatic  | G12R         | 0.24 |
|    |     | -            | -        | -       | <i>TP53</i>   | somatic  | S241fs       | 0.35 |
|    |     | -            | -        | -       | <i>MLH1</i>   | germline | V143D        | 0.47 |
| 28 | IVa | <i>BRCA2</i> | germline | K799R   | <i>KRAS</i>   | somatic  | G12D         | 0.10 |
| 29 | IVb | <i>BRCA2</i> | germline | R18H    | <i>KRAS</i>   | somatic  | G12D         | 0.21 |
| 30 | IVa | -            | -        | -       | <i>KRAS</i>   | somatic  | G12D         | 0.20 |
|    |     | -            | -        | -       | <i>TP53</i>   | somatic  | I255_T256del | 0.11 |
|    |     | -            | -        | -       | <i>MLH1</i>   | germline | V143D        | 0.50 |
| 31 | III | -            | -        | -       | <i>KRAS</i>   | somatic  | G12D         | 0.20 |
|    |     | -            | -        | -       | <i>SMAD4</i>  | somatic  | L529fs       | 0.11 |
| 32 | III | <i>BRCA2</i> | germline | V208G   | <i>KRAS</i>   | somatic  | G12V         | 0.14 |
|    |     | -            | -        | -       | <i>SMAD4</i>  | somatic  | H105fs       | 0.15 |
| 33 | III | -            | -        | -       | <i>KRAS</i>   | somatic  | G12R         | 0.05 |
|    |     | -            | -        | -       | <i>TP53</i>   | somatic  | G245S        | 0.06 |
| 34 | II  | -            | -        | -       | <i>KRAS</i>   | somatic  | G12V         | 0.13 |
|    |     | -            | -        | -       | <i>SMAD4</i>  | somatic  | R361S        | 0.18 |
| 35 | IVa | <i>BRCA2</i> | germline | R2964T  | <i>KRAS</i>   | somatic  | G12D         | 0.05 |
|    |     | -            | -        | -       | <i>GNAS</i>   | somatic  | R201C        | 0.13 |
| 36 | IVa | -            | -        | -       | <i>KRAS</i>   | somatic  | G12D         | 0.39 |
|    |     | -            | -        | -       | <i>TP53</i>   | somatic  | C275Y        | 0.39 |
|    |     | -            | -        | -       | <i>CDKN2A</i> | somatic  | E88X         | 0.37 |
| 37 | II  | -            | -        | -       | <i>KRAS</i>   | somatic  | G12R         | 0.10 |
| 38 | I   | -            | -        | -       | <i>KRAS</i>   | somatic  | G12A         | 0.13 |
|    |     | -            | -        | -       | <i>GNAS</i>   | somatic  | R201H        | 0.11 |
| 41 | III | -            | -        | -       | <i>KRAS</i>   | somatic  | G12D         | 0.33 |
|    |     | -            | -        | -       | <i>SMAD4</i>  | somatic  | R445X        | 0.39 |
| 42 | II  | <i>BRCA1</i> | germline | M1628T  | <i>KRAS</i>   | somatic  | G12V         | 0.12 |
|    |     | -            | -        | -       | <i>TP53</i>   | somatic  | Q104fs       | 0.19 |
|    |     | -            | -        | -       | <i>CDKN2A</i> | somatic  | R58X         | 0.14 |

\*No mutations detected in Case 25 at pStage III, Case 39 at pStage Iva, and Case 40 at pStage IVa.

AF, allele frequency.

**Supplementary Table S5. BRCA pathway mutations and common hotspots mutations**

| Genes with common hotspots mutations | BRCA pathway genes                 |                                 | P-value |      |
|--------------------------------------|------------------------------------|---------------------------------|---------|------|
|                                      | Potentially deleterious mutations* | Wild type or benign mutations** |         |      |
| <i>KRAS</i>                          | Mutant                             | 7                               | 30      | 0.29 |
|                                      | Wild                               | 2                               | 3       |      |
| <i>TP53</i>                          | Mutant                             | 1                               | 13      | 0.23 |
|                                      | Wild                               | 8                               | 20      |      |
| <i>SMAD4</i>                         | Mutant                             | 2                               | 5       | 0.63 |
|                                      | Wild                               | 7                               | 28      |      |
| <i>CDKN2A</i>                        | Mutant                             | 0                               | 3       | 1.00 |
|                                      | Wild                               | 9                               | 30      |      |
| <i>GNAS</i>                          | Mutant                             | 3                               | 3       | 0.10 |
|                                      | Wild                               | 6                               | 30      |      |

\*Patients with mutations predicted as pathogenic, conflicting, uncertain, or no information by ClinVar. \*\*Patients with mutations predicted as benign by Clinvar or those without mutations.

**Supplementary Table S6.** Primers used for PCR and validation by Sanger sequencing

| Gene           | Exon | Primers                   |                         |
|----------------|------|---------------------------|-------------------------|
|                |      | Forward                   | Reverse                 |
| <i>MLH1</i>    | 11   | TGCTGGCCCTCTGGGGAGATGG    | TGGCCTGGGGCTGACTGGACAGG |
| <i>CDKN2A</i>  | 2    | TCCGTCATGCCGGCCCCAC       | GTCCACGGGCAGACGGCCCC    |
| <i>KRAS</i>    | 2    | CATGTTCTAATATAGTCACATTTTC | ATGCATATTAACAAGATTTACC  |
|                | 3    | TTCCTACAGGAAGCAAGTAG      | CACCTATAATGGTGAATATCTTC |
| <i>BRCA2</i>   | 2    | AATGTGGCTAGTGGCACCGG      | GCAACACTGTGACGTACTGGG   |
|                | 7    | GCATTCTGCCTCATAACAGGC     | TGACACCACTGGACTACCAC    |
|                | 10   | GACCACATTGGAAAGTCAATGCC   | CATTCACAGGCCAAAGACGG    |
|                | 10   | GCTCACAGAAGGAGGACTCC      | GCTTCAAAGTGGGCTGAACAG   |
|                | 11   | GCTGCAGCATGTCACCCAG       | CAGGTGGCAACAGCTCAACG    |
|                | 11   | GAGAAACCCAGAGCACTGTG      | GGTGAAGCCTGTTCTTTTCCC   |
|                | 11   | TTGGCTGCAGCATGTCACCC      | CAGGTGGCAACAGCTCAACG    |
|                | 11   | CAGTCCCCTTATTCAGTCATTG    | CTTCAACATTCTTCAATACTGGC |
|                | 11   | CGAACATTCAGACCAGCTCAC     | GGAAACTTGCTTCCACTTGC    |
|                | 22   | ACAAGCTCAGATCCAGTTGG      | ACAAGCTCAGATCCAGTTGG    |
|                | 27   | GTTCCACACCTGTCTCAGCCC     | CTGAACTGGTGGGAGCAGTCC   |
| <i>RBI</i>     | 10   | GAAATCTGTGCCTCTGTGTG      | TACCATGTGCAATACCTGTC    |
| <i>PALB2</i>   | 5    | GCGCCTGATGATAATGACAGGCC   | CTGGGCTGCCTGAACTGTGC    |
| <i>BRCA1</i>   | 9    | CACTGCAGGCTTTCTGTGG       | CGGCTAATTGTGCTCACTGTAC  |
|                | 14   | CAGAGGGAACCCCTTACCTGG     | GGGGTCAGGCCAGACACC      |
| <i>TP53</i>    | 4    | TGCACCAGCAGCTCCTACAC      | CCCAGAATGCAAGAAGCCAG    |
|                | 5    | CTGTTCACTTGTGCCCTGAC      | GTGGAATCAACCCACAGCTG    |
|                | 5    | CGCCATGGCCATCTACAAGC      | AACCAGCCCTGTGCTCTCTC    |
|                | 6    | GCGTGTGGAGTATTTGGATGACAG  | TGGAGGGCCACTGACAACC     |
|                | 7    | GTGTAACAGTTCCTGCATGGGC    | TCAGAGGCAAGCAGAGGCTG    |
|                | 7    | ATCTTGGGCCTGTGTTATCTC     | CCAGTGTGATGATGGTGAGG    |
|                | 8    | GCTTCTCTTTTCTATCCTGAG     | GAGATTCTCTTCTCTGTGC     |
|                | 8    | GCGTGTTTGTGCCTGTCTG       | CCGCTTCTTGTCTGCTTGC     |
| <i>SMAD4</i>   | 3    | AAACCTGAGCACAGGCCTTG      | CCAGGTGATACAACCTCGTTCGT |
|                | 9    | GCTCCTGAGTATTGGTGTCC      | CACCGACAATTAAGATGGAGTG  |
|                | 10   | TGCACATAGGCAAAGGTGTG      | CCATTCCTTCCACCAGATTTCC  |
|                | 11   | TGGTGAGCTCCAAGCCACCTTTC   | GTTTCTGCCACGGCTGCTG     |
|                | 12   | GGGAGGATGGGAAGAGATCACCC   | AAGGTAAAGGGCCCCAACGG    |
| <i>GNAS</i>    | 8    | ACTGTTTCGGTTGGCTTTGG      | GGTAACAGTTGGCTTACTGG    |
| <i>SMARCB1</i> | 2    | GATACCCCTCACTCTGGAGGCG    | CTCCCTGCCCCGACTAAGGCC   |



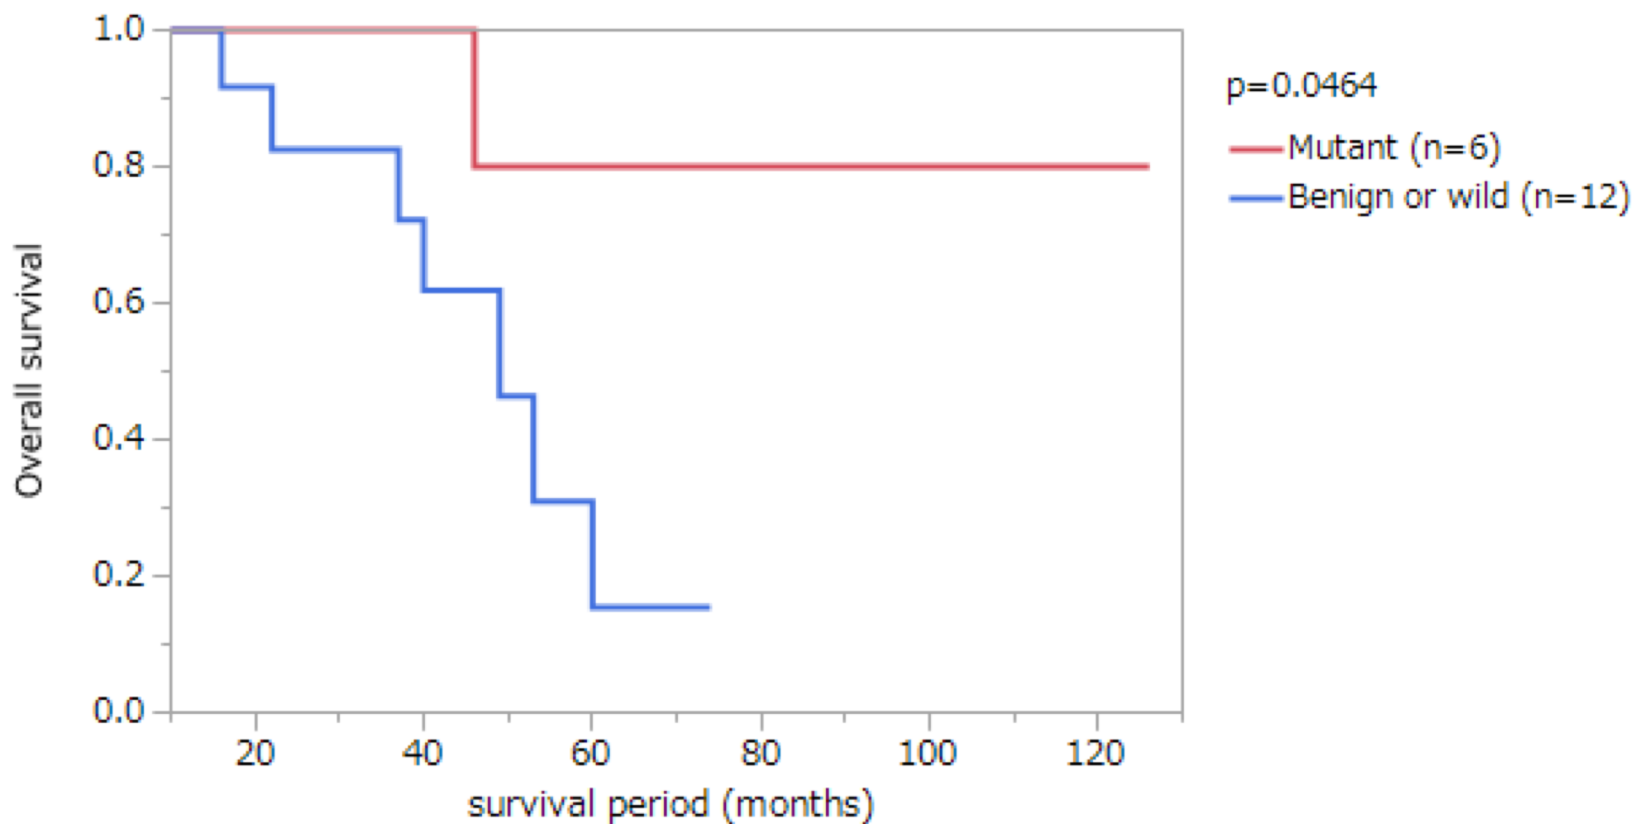

Supplementary Figure S1. Kaplan-Meier survival analyses of patients with pStage III pancreatic ductal adenocarcinomas (PDACs) according to mutations in the BRCA pathway genes. Six patients with PDACs with potentially deleterious mutations in BRCA pathway genes, namely, BRCA1, BRCA2 and PALB2 (Mutant), and 12 patients with PDACs with benign mutations or without mutations in the BRCA pathway genes (Benign or wild) were compared. The P value was obtained by Log-rank test.
